# Supplementary material for: Mixed-solution synthesis of sea urchin-like NiSe nanofiber assemblies as economical Pt-free catalysts for electrochemical H2 production
Source: Royal Society of Chemistry journal article supplement (doi:10.1039/c2jm31916k), 2012-01-01
Supplement: c2jm31916k.pdf [file c2jm31916k.pdf]

# Mixed-Solution Synthesis of Sea Urchin-Like NiSe Nanofiber Assemblies as Economical Pt-Free Catalysts for Electrochemical H<sub>2</sub> Production

Min-Rui Gao, Zhao-Yang Lin, Tao-Tao Zhuang, Jun Jiang, Yun-Fei Xu, Shu-Hong Yu\*

Division of Nanomaterials & Chemistry, Hefei National Laboratory for Physical Sciences at Microscale, Department of Chemistry, University of Science and Technology of China, Hefei 230026, P. R. China

\* To whom correspondence should be addressed. E-mail: [shyu@ustc.edu.cn](mailto:shyu@ustc.edu.cn) Fax: (+)86 551 3603040

**RHE Calibration.** In all measurements, we used SCE as the reference electrode. It was calibrated with respect to RHE. The calibration was performed in the high purity hydrogen saturated electrolyte with a Pt foil as the working electrode. Cyclic voltammetry (CV) was run at a scan rate of 1 mV s<sup>-1</sup>, and the average of the two potentials at which the current crossed zero was taken to be the thermodynamic potential for the hydrogen electrode reaction. The CV result was shown below:

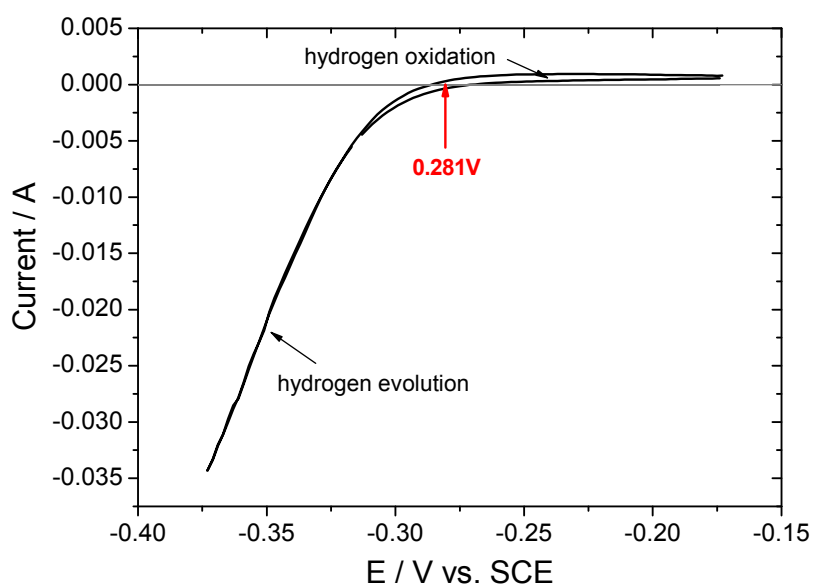

Therefore, in 0.5 M H<sub>2</sub>SO<sub>4</sub> solution, E(RHE) = E(SCE) + 0.281 V.

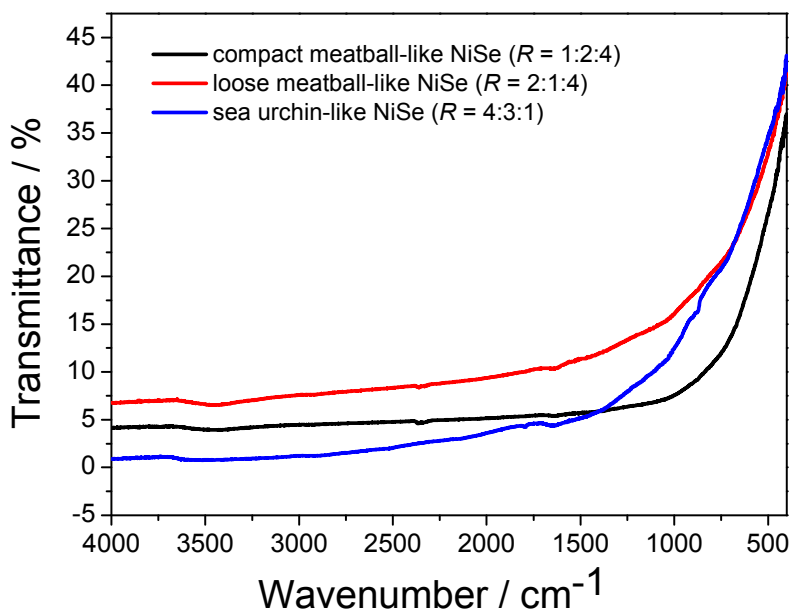

**Fig. S1** FT-IR spectra of the samples prepared at 180 °C for 12 h in a ternary solution with different volume ratios of  $V_{\text{DETA}}/V_{\text{Ni}^{2+}\text{H}^{+}\text{H}_2\text{O}}/V_{\text{DIW}}$ .

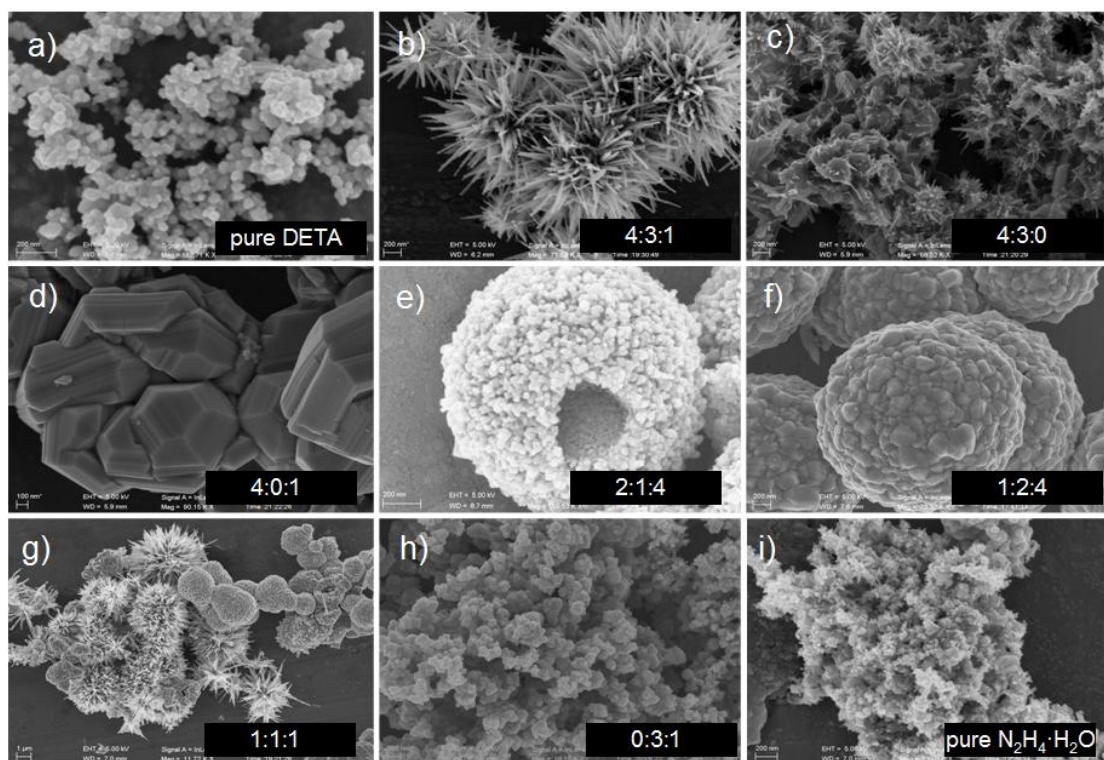

**Fig. S2** SEM images of the products prepared at 180 °C for 12 h in a ternary solution with different volume ratios of  $V_{\text{DETA}}/V_{\text{N}_2\text{H}_4\cdot\text{H}_2\text{O}}/V_{\text{DIW}}$ .

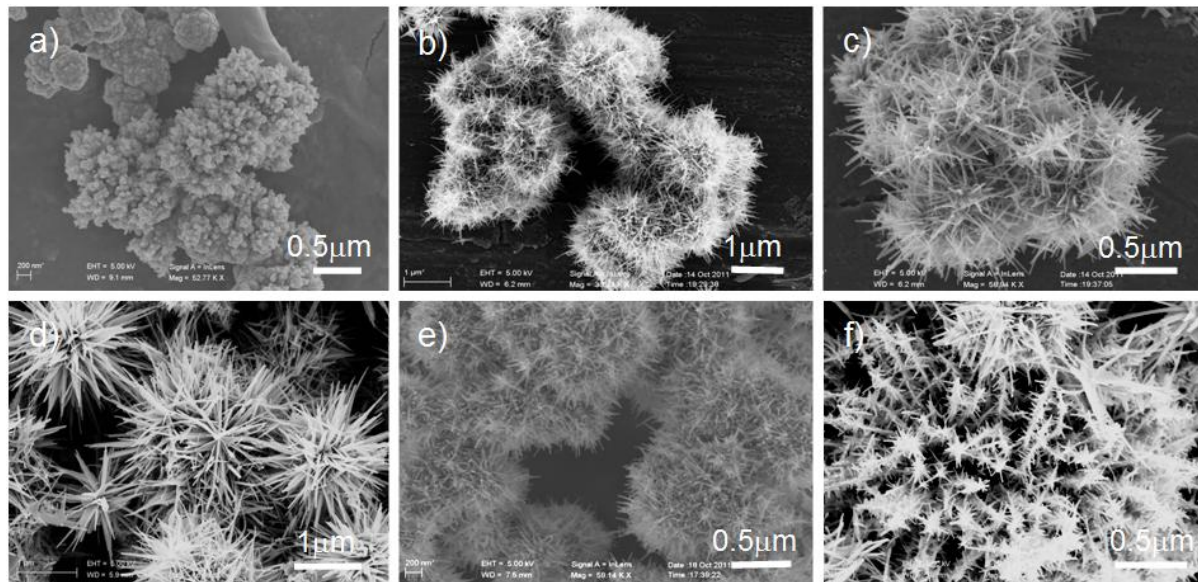

**Fig. S3** SEM images of the samples prepared at 180 °C in a ternary solution ( $V_{\text{DETA}}/V_{\text{N}_2\text{H}_4\cdot\text{H}_2\text{O}}/V_{\text{DIW}} = 4:3:1$ ) for different reaction times. (a) 1 h; (b) 4 h; (c) 8 h; (d) 12 h; (e) 16 h; (f) 20 h.
